1 **PilB from *Streptococcus sanguinis* is a bimodular type IV pilin with a direct**  
2 **role in adhesion**

3

4 Claire Raynaud<sup>1,¶</sup>, Devon Sheppard<sup>1,¶</sup>, Jamie-Lee Berry<sup>1</sup>, Ishwori Gurung<sup>1</sup>, Vladimir  
5 Pelicic<sup>1,2,\*</sup>

6

7 <sup>1</sup>MRC Centre for Molecular Bacteriology and Infection, Imperial College London,  
8 London, United Kingdom

9

10 <sup>2</sup>Laboratoire de Chimie Bactérienne, Aix-Marseille Université-CNRS (UMR 7283),  
11 Institut de Microbiologie de la Méditerranée, Marseille, France

12

13 <sup>¶</sup>These authors contributed equally

14

15 \*Corresponding author

16 E-mail: vladimir.pelicic@inserm.fr

17 **ABSTRACT**

18 Type IV pili (T4P) are functionally versatile filamentous nanomachines, nearly  
19 ubiquitous in prokaryotes. They are predominantly polymers of one major pilin, but  
20 also contain minor pilins whose functions are often poorly defined, and likely to be  
21 diverse. Here, we show that the minor pilin PilB from the T4P of *S. sanguinis* displays  
22 an unusual bimodular 3D structure, with a bulky von Willebrand factor A-like (vWA)  
23 module "grafted" onto a small pilin module via a short unstructured loop. Structural  
24 modelling suggests that PilB is only compatible with a localisation at the tip of T4P.  
25 By performing a detailed functional analysis, we found that (i) the vWA module  
26 contains a canonical metal ion-dependent adhesion site (MIDAS), preferentially  
27 binding  $Mg^{2+}$  and  $Mn^{2+}$ , (ii) abolishing metal-binding has no impact on the structure of  
28 PilB or piliation, (iii) metal-binding is important for *S. sanguinis* T4P-mediated  
29 twitching motility and adhesion to eukaryotic cells, and (iv) the vWA module shows  
30 an intrinsic binding ability to several host proteins. These findings reveal an elegant,  
31 yet simple, evolutionary tinkering strategy to increase T4P functional versatility, by  
32 grafting an adhesive module onto a pilin for presentation by the filaments. This  
33 strategy appears to have been extensively used by bacteria, in which modular pilins  
34 are widespread and exhibit an astonishing variety of architectures.

## 35 INTRODUCTION

36 Type IV pili (T4P) are functionally versatile filaments widespread in prokaryotes,  
37 implicated in a variety of functions such as adhesion, twitching motility, DNA uptake  
38 *etc*<sup>1</sup>. T4P are helical polymers consisting of type IV pilins, usually one major pilin and  
39 several minor (low abundance) ones, assembled by distinctive multi-protein  
40 machineries. These defining features are shared by a superfamily of filamentous  
41 nanomachines known as type IV filaments (T4F)<sup>1</sup>, which are ubiquitous in  
42 prokaryotes<sup>2</sup>.

43 T4P have been intensively studied for decades in diderm bacteria because  
44 they play a central role in pathogenesis in several important human pathogens<sup>3</sup>. The  
45 following global picture of T4P biology has emerged from these studies. The pilus  
46 subunits, type IV pilins, are characterised by a short N-terminal sequence motif  
47 known as class III signal peptide, which consists of a hydrophilic leader peptide  
48 ending with a small residue (Gly or Ala), followed by a tract of 21 predominantly  
49 hydrophobic residues<sup>4</sup>. This tract constitutes the N-terminal segment ( $\alpha$ 1N) of an  $\alpha$ -  
50 helix ( $\alpha$ 1) of ~50 residues, which is the universally conserved structural feature in  
51 type IV pilins. Usually, the  $\alpha$ 1N helix protrudes from a globular head most often  
52 consisting of a  $\beta$ -sheet composed of several antiparallel  $\beta$ -strands, which gives pilins  
53 their characteristic "lollipop" shape<sup>4</sup>. The hydrophilic leader peptide is then processed  
54 by a dedicated prepilin peptidase<sup>5</sup> upon pilin translocation across the cytoplasmic  
55 membrane (CM) by the general secretory pathway<sup>6,7</sup>. Processed pilins remain  
56 embedded in the CM via their  $\alpha$ 1N, generating a pool of subunits ready for  
57 polymerisation. Filament assembly, which occurs from tip to base, is mediated at the  
58 CM by a complex multi-protein machinery (10-20 components)<sup>1</sup>, centred on an  
59 integral membrane platform protein and a cytoplasmic extension ATPase<sup>8</sup>. Recent  
60 cryo-EM structures have revealed that T4P are right-handed helical polymers in  
61 which pilins are held together by extensive interactions between their  $\alpha$ 1N helices,  
62 which are partially melted and run approximately parallel to each other within the

63 filament core<sup>9,10</sup>. One of the properties of T4P key for their functional versatility is  
64 their ability to retract, which has been best characterised for T4aP (where "a"  
65 denotes the subtype). In T4aP, retraction results from rapid filament depolymerisation  
66 powered by the cytoplasmic retraction ATPase PilT<sup>11</sup>, which generates important  
67 tensile forces<sup>12,13</sup>.

68 Studying T4P in monoderm bacteria represents a promising alternative  
69 research avenue<sup>14</sup>. *Streptococcus sanguinis*, a commensal of the oral cavity that  
70 commonly causes life-threatening infective endocarditis (IE), has emerged as a  
71 monoderm model for deciphering T4P biology<sup>15</sup>. Our comprehensive functional  
72 analysis of *S. sanguinis* T4P<sup>16</sup> revealed that they are canonical T4aP. Indeed,  
73 filaments are (i) assembled by a multi-protein machinery similar to diderm T4aP  
74 species, but simpler with only ten components, (ii) retracted by a PilT ATPase,  
75 generating tensile forces similar to diderm species, and (iii) powering intense  
76 twitching motility, leading to spreading zones around bacteria growing on plates,  
77 visible by the naked eye. Subsequently, we performed a global biochemical and  
78 structural analysis of *S. sanguinis* T4P<sup>17</sup>, showing that (i) they are hetero-polymers  
79 composed of two major pilins, PilE1 and PilE2, rather than one as normally seen, (ii)  
80 the major pilins display classical type IV pilin 3D structure, and (iii) the filaments  
81 contain a low abundance of three minor pilins (PilA, PilB, and PilC), which are  
82 required for piliation.

83 The present study was prompted by a perplexing observation, *i.e.*, that the  
84 minor pilin PilB harbours a protein domain that has been extensively studied in  
85 several eukaryotic proteins where it mediates adhesion to a variety of protein  
86 ligands<sup>18</sup>. This suggested that PilB might be an adhesin, promoting T4P-mediated  
87 adhesion of *S. sanguinis* to host cells and proteins. Therefore, since both the  
88 molecular mechanisms of T4P-mediated adhesion and the exact role of minor pilins  
89 in T4P biology remain incompletely understood<sup>1</sup>, we decided to perform a

90 structure/function analysis of PilB, which is reported here. This uncovered a  
91 widespread strategy for minor pilins to enhance the functional properties of T4P.

## 92 RESULTS

93

### 94 **PilB displays a modular pilin architecture**

95 PilB, one of the three minor pilins in *S. sanguinis* T4P<sup>17</sup>, exhibits a canonical N-  
96 terminal class III signal peptide, the defining feature of type IV pilins<sup>4</sup>. This sequence  
97 motif consists of a seven-residue leader peptide composed predominantly of  
98 hydrophilic and neutral amino acids (aa), ending with a conserved Gly (Fig. 1A). This  
99 leader peptide, which is processed by the prepilin peptidase PilD<sup>17</sup>, is followed by a  
100 stretch of 21 predominantly hydrophobic aa, except for a negatively charged Glu in  
101 position 5 (Fig. 1A). Processed PilB is unusually large for a pilin, with a predicted  
102 molecular mass of 50.5 kDa (Fig. 1B). For comparison, the two major pilins of *S.*  
103 *sanguinis* T4P, PilE1 and PilE2<sup>16</sup>, have typical pilin sizes of 14.7 and 14.1 kDa,  
104 respectively (Fig. 1B). The larger size of PilB is due to the presence of a C-terminal  
105 domain (Fig. 1B) readily detectable by a bioinformatic analysis, which belongs to the  
106 von Willebrand factor A-like domain superfamily (InterPro entry IPR036465). We will  
107 refer to this domain as vWA. The prototypical vWA domain is found in the von  
108 Willebrand factor (vWF), a human blood protein required for haemostasis<sup>19</sup>, the  
109 physiological process that prevents/stops bleeding. vWA domains, which are found in  
110 more than 300,000 proteins in the three domains of life, have been extensively  
111 studied in eukaryotic proteins where they mediate adhesion to a variety of protein  
112 ligands<sup>18</sup>. They have been much less studied in bacteria. Of note, the PilB vWA  
113 domain is predicted to contain a metal coordination site known as MIDAS, for metal  
114 ion-dependent adhesion site<sup>20</sup> (Fig. 1A), which was found to be important for ligand-  
115 binding in several eukaryotic vWA-containing proteins<sup>21</sup>.

116 The above-described architecture is unusual for type IV pilins for two reasons.  
117 First, in contrast to classical pilins that consist only of a pilin module<sup>4</sup>, defined by a  
118 short N-terminal IPR012902 motif within the class III signal peptide (Fig. 1B), PilB  
119 apparently has an additional module. Second, the extra C-terminal module in PilB

120 corresponds to a well-defined functional domain not specific to T4P biology, vWA,  
121 which is often associated with adhesion to protein ligands<sup>18,21</sup>. This has not been  
122 previously reported in T4P. This is what we call a modular architecture, and why we  
123 refer to PilB as a modular pilin.

124 Taken together, these findings suggest that PilB is a modular pilin in which a  
125 functional module has been grafted during evolution onto a pilin moiety in order to  
126 promote T4P-mediated adhesion of *S. sanguinis* to protein ligands.

127

128 **Crystal structure of PilB reveals a bimodular pilin in which a small type IV pilin**  
129 **module is linked to a bulky vWA module via a short loop**

130 High-resolution structural information is required to confirm that PilB is composed of  
131 two modules, but also to understand how modular pilins are polymerised in the  
132 filaments and how they modulate T4P functionality. We therefore endeavoured to  
133 solve the 3D structure of PilB by X-ray crystallography. To facilitate protein  
134 purification, we used a synthetic *pilB* gene codon-optimised for expression in  
135 *Escherichia coli*, and produced a recombinant protein in which the N-terminal 35 aa  
136 of PilB (encompassing the hydrophobic  $\alpha$ 1N) (Fig. 1A) were replaced by a  
137 hexahistidine tag (6His)<sup>17</sup>. This is a commonly used approach in the field since the  
138 truncation of  $\alpha$ 1N has minimal structural impact on the rest of the protein<sup>22</sup>. The  
139 resulting 48.4 kDa 6His-PilB protein was soluble and could be purified using a  
140 combination of affinity and gel-filtration chromatography. The protein readily  
141 crystallised in multiple conditions, and after optimising the best diffracting crystals, we  
142 collected a complete dataset on crystals forming in the space group  $P6_1$  (Table 1).  
143 After phase determination, done using crystals produced in the presence of seleno-  
144 methionine (SeMet), we solved the 2.26 Å structure of native 6His-PilB. As can be  
145 seen in Fig. 2A, this structure reveals a clear bimodular architecture with a small pilin  
146 moiety (highlighted in blue) linked to a bulky vWA moiety (in red) by a short nine-  
147 residue unstructured loop (grey).

148           While a bioinformatic analysis could only predict that the extreme N-terminus of  
149 PilB corresponds to an IPR012902 class III signal peptide motif, our structure reveals  
150 that the first 180 residues of processed PilB clearly display a type IV pilin fold<sup>4</sup> and  
151 thus indeed correspond to a pilin module (Fig. 2B). The pilin module exhibits a long  
152 N-terminal  $\alpha$ -helix packed against, not one  $\beta$ -sheet as usual, but two consecutive  $\beta$ -  
153 sheets consisting of six and three  $\beta$ -strands respectively, which together form the  
154 globular head of the pilin. The 432918 topology, *i.e.*, the order of the  $\beta$ -strands in the  
155 first  $\beta$ -sheet (Fig. 2B), is unusual since the  $\beta$ -strands are not contiguous along the  
156 protein sequence. Moreover, the last portion of this  $\beta$ -sheet forms a  $\Psi$ -loop<sup>23</sup> in which  
157 two antiparallel strands ( $\beta$ 8 and  $\beta$ 9) are linked via  $\beta$ 1 in between, connected to both  
158 of them by hydrogen bonds. This motif occurs rarely in proteins<sup>23</sup>.

159           As for the vWA module (Fig. 2C), the structure strengthens the predictions of  
160 the bioinformatic analysis. The vWA moiety of PilB adopts a canonical vWA fold<sup>20,24</sup>,  
161 with a central  $\beta$ -sheet (composed of five parallel and one antiparallel  $\beta$ -strands)  
162 surrounded on both sides by a series of  $\alpha$ -helices. Consequently, the vWA module of  
163 PilB shows high structural similarity to many vWA-containing proteins with which it  
164 shares little sequence identity. For example, the vWA module of PilB is very similar to  
165 the third vWA domain of human vWF<sup>25</sup> (Fig. S1), with a root mean square deviation  
166 (RMSD) of 1.72 Å when the two structures are superposed. As in eukaryotic vWA-  
167 containing proteins<sup>20,24</sup>, PilB exhibits a MIDAS located on top of the central  $\beta$ -sheet  
168 (Fig. 2C). However, in contrast to these proteins, the MIDAS in PilB is flanked by two  
169 protruding "arms", which is reminiscent of the RrgA adhesin from *Streptococcus*  
170 *pneumoniae*<sup>26</sup>. The first arm is mainly unstructured, while the second folds into a  
171 four-stranded  $\beta$ -sheet (Fig. 2C). The MIDAS motif in PilB, which is formed by  
172 residues conserved in vWA-containing proteins, non-contiguous in the sequence  
173 (Fig. 1A) but in close proximity in the 3D structure (Fig. 2C), is functional since it  
174 coordinates a metal ion in the crystal. We have modelled the metal as Mg<sup>+2</sup> because  
175 of its abundance in the protein expression medium and the high affinity of PilB for it



176 (see below). The Ser<sub>206</sub>, Ser<sub>208</sub>, Thr<sub>291</sub> and Asp<sub>319</sub> residues in the MIDAS motif<sup>20</sup> of  
177 PilB form direct hydrogen bonds with the metal through oxygen atoms (Fig. 2C),  
178 while two additional coordination sites are provided by water molecules.

179 An important biological implication of the PilB structure is that modular pilins,  
180 despite their large size, are likely to be polymerised into T4P in the same way as  
181 classical pilins<sup>4</sup>, *i.e.*, via their N-terminal pilin module. We therefore tested by  
182 structural modelling whether PilB could pack into filaments. First, we produced a full-  
183 length 3D structural model of PilB including the missing  $\alpha$ 1N (Fig. S2), which was  
184 truncated in the recombinant protein that we purified. Since a portion of  $\alpha$ 1N in major  
185 pilins is melted during filament assembly, as observed in several T4aP cryo-EM  
186 structures<sup>9,10</sup>, the  $\alpha$ 1N of PilB was modelled with a melted segment. This is  
187 consistent with the presence of the helix-breaking Gly residue in position 21 of  $\alpha$ 1N  
188 (Fig. 1A). Then, we fitted this full-length PilB into a previously generated model of *S.*  
189 *sanguinis* T4P, a right-handed helical heteropolymer where major pilins PilE1/PilE2  
190 are held together by interactions between their  $\alpha$ 1N helices (Fig. 3A), which was  
191 based on the cryo-EM structure of *Neisseria meningitidis* T4P<sup>9</sup>. Despite its unusual  
192 modular structure, PilB can be readily modelled into T4P, its pilin module establishing  
193 extensive hydrophobic interactions via its  $\alpha$ 1N with the  $\alpha$ 1N of neighbouring major  
194 pilins (Fig. 3A). This suggests that PilB will assemble into filaments in the same way  
195 as classical pilins<sup>9,10</sup>. However, PilB can only be accommodated at the tip of the  
196 filaments because the bulky vWA module sits on top of the pilin module in the PilB  
197 structure, and essentially prevents other pilin subunits from being modelled above it  
198 (Fig. 3B). Accordingly, when PilB is modelled in the body of the filament (Fig. S3A), it  
199 exhibits important steric clashes with neighbouring major pilins (Fig. S3B).

200 Together, these structural findings show that PilB is a bimodular protein  
201 composed of two fused but clearly distinct structural modules. The pilin module  
202 adopts a canonical type IV pilin fold<sup>4</sup>, which explains how modular pilins are  
203 polymerised into T4P, most probably at their tip. The second module, which is linked

204 to the end of the pilin module via a short unstructured loop, adopts a vWA fold<sup>20,24</sup>  
205 with a clearly defined MIDAS that coordinates a metal. Since the vWA motif in many  
206 eukaryotic proteins is involved in adhesion to protein ligands<sup>18,21</sup>, our structure  
207 strengthens our working hypothesis that PilB might be an adhesin.

208

209 **Functional analysis of the MIDAS in PilB reveals that metal binding, although**  
210 **structurally dispensable, is important for T4P functionality**

211 Our PilB structure revealed that Mg<sup>2+</sup>, despite not being added during crystallisation,  
212 is bound by the MIDAS. In eukaryotic proteins, the MIDAS sometimes coordinates  
213 Mn<sup>2+</sup> as well<sup>20,24</sup>. We therefore tested the metal binding specificity of the MIDAS in  
214 PilB using ThermoFluor. This fluorescent-based method, which measures changes in  
215 thermal denaturation temperature, is a commonly used approach for detecting and  
216 quantifying protein-ligand interactions<sup>27</sup>. We determined the affinity of purified PilB for  
217 the Mg<sup>2+</sup>, Mn<sup>2+</sup>, and Ca<sup>2+</sup> divalent cations (Fig. 4A). While no binding was detected to  
218 Ca<sup>2+</sup>, we found that PilB binds Mg<sup>2+</sup> and Mn<sup>2+</sup> efficiently in the micromolar range, with  
219 estimated K<sub>d</sub> of 70 and 54 μM, respectively. To confirm that metal binding involves  
220 the MIDAS motif, we produced the PilB<sub>D319A</sub> protein in which the key MIDAS residue  
221 Asp<sub>319</sub> (Fig. 2C) was changed into an Ala by site-directed mutagenesis. Binding  
222 assays performed with PilB<sub>D319A</sub> showed that changing this one residue abolishes the  
223 metal-binding ability of PilB for both Mg<sup>2+</sup> and Mn<sup>2+</sup> (Fig. 4B). These findings show  
224 that the MIDAS in PilB is functional and preferentially binds Mg<sup>2+</sup> and Mn<sup>2+</sup>.

225 Next, to determine whether metal presence/absence might impact the 3D  
226 structure of PilB, we solved the structure of PilB<sub>D319A</sub> by X-ray crystallography. The  
227 PilB<sub>D319A</sub> protein readily crystallised in the same condition as the wild-type (WT)  
228 protein, and we collected a complete dataset on crystals diffracting to a resolution of  
229 3 Å (Table 1). The structure of PilB<sub>D319A</sub> (Fig. 5A), which was solved by molecular  
230 replacement, shows that, no metal is occupying the mutated MIDAS pocket on top of  
231 the central β-sheet (Fig. 5B), which is consistent with results of metal binding assays.

232 When the structures of PilB and PilB<sub>D319A</sub> were compared, we found that they are  
233 essentially identical, superposing onto each other (Fig. 5C) with an RMSD of merely  
234 0.48 Å, including the two arms flanking the MIDAS pocket. This shows that metal-  
235 binding by the MIDAS has no detectable structural impact on PilB.

236 Next, we explored whether MIDAS-mediated metal-binding by PilB is important  
237 for piliation and/or T4P-powered twitching motility, both of which were previously  
238 shown to be abolished in a  $\Delta pilB$  mutant<sup>16</sup>. We therefore constructed an unmarked *S.*  
239 *sanguinis* mutant in which the endogenous *pilB* gene was altered by site-directed  
240 mutagenesis to produce PilB<sub>D319A</sub> with an inactive MIDAS. We first tested whether the  
241 *pilB*<sub>D319A</sub> mutant retains the ability to assemble T4P using filament purification<sup>16</sup>. As  
242 can be seen in Fig. 6A, in which purified T4P were separated by SDS-PAGE and  
243 stained with Coomassie blue, the *pilB*<sub>D319A</sub> mutant is piliated. This is evidenced by the  
244 presence of the two bands corresponding to major pilins Pile1 and Pile2, which are  
245 absent in a non-piliated  $\Delta pilD$  control (Fig. 6A). Moreover, the amount of T4P that  
246 can be purified from the *pilB*<sub>D319A</sub> mutant and WT strain appear comparable. We then  
247 tested whether the pili in the *pilB*<sub>D319A</sub> mutant are able to mediate twitching motility<sup>16</sup>.  
248 For the WT strain, twitching motility is evidenced by spreading zones around bacteria  
249 grown on agar (Fig. 6B). Spreading zones were absent for the *pilB*<sub>D319A</sub> mutant, which  
250 therefore exhibits no detectable twitching motility (Fig. 6B). This shows that the  
251 MIDAS-mediated metal-binding ability of PilB, while dispensable for piliation, is  
252 important for T4P-mediated twitching motility.

253 Together, these findings show that the MIDAS in PilB is a functional metal-  
254 binding site, dispensable for piliation and protein folding, but essential for T4P  
255 functionality.

256

257 **T4P-mediated adhesion to eukaryotic cells requires PilB, which specifically**  
258 **binds several human proteins**

259 Since vWA is involved in adhesion in many eukaryotic proteins<sup>18,21</sup>, our original  
260 hypothesis was that PilB might mediate *S. sanguinis* adhesion to host cells and/or  
261 proteins, which we aimed to test next. First, we determined whether *S. sanguinis* T4P  
262 might be involved in its well-known ability to adhere to host cells<sup>28</sup>. After testing a few  
263 eukaryotic cell lines, we opted for CHO cells because the WT strain adheres very  
264 efficiently to them. When CHO cells were infected by *S. sanguinis* at a multiplicity of  
265 infection (MOI) of 10,  $31.6 \pm 9.1$  % of the bacterial inoculum adhered to the cells. In  
266 contrast, a non-piliated  $\Delta pilD$  mutant showed a significantly reduced adhesion, with  
267 an 18-fold decrease relative to the WT (Fig. 7). Next, we tested our original  
268 assumption that PilB might be an adhesin, by quantifying the adhesion of the  
269 *pilB<sub>D319A</sub>* mutant. As can be seen in Fig. 7, although the *pilB<sub>D319A</sub>* mutant is piliated, its  
270 adhesion to CHO cells is dramatically impaired, with a 33-fold decrease when  
271 compared to the WT. These findings show that *S. sanguinis* T4P are multi-functional  
272 filaments also important for adhesion to eukaryotic cells, and that PilB plays an  
273 important role.

274 Since the vWA domain in multiple eukaryotic proteins has been shown to  
275 mediate cell-extracellular matrix (ECM) interactions<sup>21</sup>, we reasoned that PilB might  
276 recognise similar ligands because it exhibits a canonical vWA module (Fig. S1). We  
277 tested this hypothesis by performing binding assays with purified PilB using enzyme-  
278 linked immunosorbent assay (ELISA). In brief, we coated 96-well plates with selected  
279 putative ligands, added serial dilutions of purified 6His-PilB, and detected binding  
280 using an anti-6His antibody. We tested binding to fibrinogen and the ECM proteins  
281 fibronectin, elastin, and laminin. While PilB exhibits no binding to BSA that was used  
282 as a negative control (Fig. 8A), dose-dependent binding to fibronectin and fibrinogen  
283 was observed, but not to the other ECM proteins that were tested (elastin and  
284 laminin). Specific binding to fibronectin and fibrinogen was in the high nanomolar  
285 range, with calculated  $K_d$  of 865 and 494 nM, respectively (Fig. 8A). Under these *in*  
286 *vitro* experimental conditions metal-coordination by the MIDAS is dispensable for

287 binding to fibronectin and fibrinogen, as demonstrated by binding assays using  
288 purified PilB<sub>D319A</sub> protein, which showed that PilB<sub>D319A</sub> binds these ligands as well as  
289 PilB (Fig. S4). Finally, to confirm the prediction that binding of PilB to the above  
290 ligands is mediated by its vWA module, we then produced and purified the PilB<sub>vWA</sub>  
291 protein corresponding only to the vWA module (see Fig. 1A). We found that PilB<sub>vWA</sub>  
292 could also bind to fibronectin and fibrinogen (Fig. 8B), with calculated K<sub>d</sub> of 337 and  
293 997 nM, respectively, which were comparable to PilB. These findings confirm that the  
294 adhesive ability of PilB is due to its vWA module.

295 Taken together, these findings show that *S. sanguinis* T4P are multi-functional  
296 filaments mediating adhesion to eukaryotic cells, and that PilB is a *bona fide* adhesin  
297 using its vWA module to bind several human protein ligands, which it shares with  
298 eukaryotic vWA-containing proteins.

299

### 300 **Pilins with modular architectures are widespread in bacteria**

301 While PilB orthologs are ubiquitous in *S. sanguinis*, which also produces a second  
302 modular pilin, PilC<sup>17</sup>, where the extra module belongs to the concanavalin A-like  
303 lectin/glucanase domain superfamily (IPR013320) (Fig. 1B), we wondered how  
304 widespread and how diverse modular pilins might be. We therefore searched the  
305 InterPro database<sup>29</sup> for all the proteins with an N-terminal IPR012902 domain, which  
306 also contain an extra domain not specific to T4P biology. This showed that modular  
307 pilins are (i) widespread with more than 1,200 proteins displaying such architecture  
308 (Supplementary data 1), (ii) present both in monoderm and diderm species, and (iii)  
309 diverse, with as many as 264 different architectures detected. Although a bimodular  
310 architecture is the most prevalent, there are modular pilins with multiple additional  
311 domains, the most extreme case being an 860-residue protein from *Candidatus*  
312 Falkowbacteria, with 12 copies of the IPR013211 motif of unknown function  
313 (Supplementary data 1). A closer inspection of the 15 most frequent modular pilin  
314 architectures offers a glimpse of their diversity (Fig. 9). While in many of these

315 proteins the extra domain has no clear function (IPR007001, IPR011871,  
316 IPR026906, PF05345, IPR006860, IPR003961, IPR021556), for others a function  
317 can be predicted. These functions include (i) binding to carbohydrates via PF13385  
318 (that overlaps with the IPR013320 lectin domain superfamily), PF13620  
319 (carbohydrate-binding-like fold), or IPR011658 (PA14 carbohydrate-binding domain),  
320 (ii) peptidase activity via IPR030392, and (iii) binding to proteins via IPR002035 (that  
321 overlaps with the IPR036465 vWA domain superfamily). These findings suggest that  
322 the rather simple modular design strategy – during which a functional module has  
323 been grafted during evolution onto a pilin moiety – appears to have been used often  
324 during evolution both by monoderm and diderm bacteria and is expected to increase  
325 the functional versatility of T4P.

326 **DISCUSSION**

327 T4F are an important research topic because of their virtual ubiquity in prokaryotes  
328 and their ability to mediate several key biological processes<sup>1</sup>. Furthermore, the  
329 molecular mechanisms of most T4F-mediated functions and the exact role of minor  
330 pilins remain incompletely understood. Therefore, in this report we focused on T4aP  
331 – the prototypical T4F<sup>1</sup> – in the recently established monoderm model *S. sanguinis*<sup>15</sup>,  
332 and performed a structure/function analysis of the unusual minor pilin PilB, which we  
333 predicted might play a role in T4P-mediated adhesion. This led to several notable  
334 findings discussed below, and confirmed predictions that the study of T4P in  
335 monoderms has the potential to shine new light on these filaments<sup>14,15</sup>.

336 The first important finding in this study is that PilB defines a new class of  
337 widespread and extremely diverse type IV pilins – the modular pilins – in which an N-  
338 terminal pilin module is fused via a short linker to distinct modules that mediate  
339 clearly defined functions. Modular pilins are likely to be tip-exposed in the filaments  
340 because of their peculiar architecture. While previous 3D structures of a few large  
341 minor pilins suggest that they are modular pilins, their second modules have no clear  
342 function and do not correspond to protein domains identifiable by available  
343 bioinformatic tools. In CofB from enterotoxigenic *E. coli* (ETEC) T4bP, there are two  
344 additional structural domains linked to the C-terminus of the pilin module by a flexible  
345 linker, a  $\beta$ -repeat domain followed by a  $\beta$ -sandwich domain<sup>30</sup>. CofB, which forms a  
346 trimer predicted to be exposed at the tip of ETEC T4bP<sup>31</sup>, appears to be an adapter  
347 for a secreted protein CofJ<sup>32</sup>, having a direct role in adhesion. In ComZ from  
348 *Thermus thermophilus* T4aP, the additional structural domain is a large  $\beta$ -solenoid  
349 inserted not at the end of the pilin module but into the  $\beta$ -sheet<sup>33</sup>. The role of ComZ is  
350 not known but it might be involved in binding extracellular DNA to promote its uptake  
351 during transformation<sup>33</sup>. This modular architecture is not restricted to T4P as it is also  
352 observed for a minor pilin from another T4F, GspK from type II secretion systems  
353 (T2SS)<sup>34</sup>. GspK, in which the additional structural domain is an  $\alpha$ -domain of unknown

354 function inserted into the  $\beta$ -sheet of the pilin module, has also been proposed to be  
355 at the tip of T2SS pseudopili, together with two other non-modular minor pilins (GspI  
356 and GspJ) with which it interacts to form a heterotrimer<sup>34</sup>. These examples suggest  
357 that we have here probably underestimated the global distribution of modular pilins,  
358 which are likely to be much more widespread because in many of them the additional  
359 modules are not yet defined by protein signatures in the databases. However, what is  
360 clear from our global analysis is that the functions associated with these modular  
361 pilins are potentially extremely diverse. Although a "common theme" appears to  
362 promote the interaction of T4F with a variety of ligands – including proteins (via vWA  
363 in PilB, and the  $\beta$ -repeat/ $\beta$ -sandwich module in CofB), carbohydrates (via a variety of  
364 lectin domains including the concanavalin A-like lectin/glucanase domain in PilC), or  
365 DNA (the putative role of the  $\beta$ -solenoid module in ComZ) – other functions are  
366 possible. This is suggested by the modular architectures IPR012902-IPR030392 or  
367 IPR012902-IPR011493 in which the second module is a predicted peptidase  
368 belonging to S74 and M26 families, respectively.

369 The functional characterisation of the vWA module in PilB including its MIDAS,  
370 showing that it is a *bona fide* adhesin, is another significant achievement of this  
371 study. First, the vWA domain, which is ubiquitous in the three domains of life and has  
372 been extensively studied in eukaryotes<sup>18,21</sup>, has been much less studied in bacteria.  
373 Second, T4P-mediated adhesion remains among the most poorly understood T4P  
374 functions<sup>1</sup>. Our functional analysis of the vWA module in PilB significantly extends  
375 what was known for prokaryotic vWA-containing proteins and highlights important  
376 similarities and differences with extensively studied prokaryotic vWA-containing  
377 proteins. Our 3D structure shows that the vWA module in PilB exhibits striking  
378 similarity to the vWA domain in eukaryotic vWA-containing proteins<sup>20,24</sup>, with a  
379 canonical MIDAS coordinating a metal. The main difference is that the MIDAS in PilB  
380 is flanked by two protruding arms, similarly to what has been described for RrgA from  
381 *S. pneumoniae*<sup>26</sup>. Interestingly, RrgA is a subunit with intrinsic adhesive properties<sup>35</sup>



382 of sortase-assembled pili in monoderms<sup>36</sup>, which are unrelated to T4P. The parallel  
383 between RrgA and PilB denotes a case of convergent evolution in which two  
384 unrelated types of pili have independently evolved a similar strategy to mediate  
385 adhesion. Testing metal binding by the MIDAS in PilB, which was previously done  
386 only for eukaryotic vWA-containing proteins<sup>37</sup>, highlight important similarities. MIDAS  
387 show no significant binding to Ca<sup>2+</sup>, and a slight preference for Mn<sup>2+</sup> over Mg<sup>2+</sup>,  
388 although the difference in affinity is much smaller than in eukaryotic proteins<sup>37</sup>. Metal  
389 binding can be abolished by altering the MIDAS motif, which has no impact on PilB  
390 structure<sup>37,38</sup>. Abolishing metal binding has no detectable effect on piliation, which is  
391 analogous to what has been reported for vWA-containing adhesins of sortase-  
392 assembled pili<sup>39,40</sup>, but it impairs T4P-mediated twitching motility. It is unclear at this  
393 stage whether the lack of motility of the *pilB*<sub>D319A</sub> mutant is due to a reduced T4P  
394 adhesion to the agar, which would be consistent with PilB role in adhesion, or to  
395 impaired filament retraction, which powers movement<sup>11</sup>. We also provide evidence  
396 that the vWA module of PilB binds several human protein ligands, which it shares  
397 with eukaryotic vWA-containing proteins such as integrins and/or vWF<sup>19,21</sup>. However,  
398 unlike in these proteins where binding is often impaired when the MIDAS is  
399 inactivated<sup>20</sup>, a notable difference is that binding to fibronectin and fibrinogen is  
400 unaffected in a PilB<sub>D319A</sub> mutant. This either suggests that the MIDAS is not  
401 implicated in binding these specific ligands, which has been described for vWF  
402 binding to collagen<sup>25</sup>, or that our *in vitro* binding assays are not sensitive enough to  
403 detect subtle but significant differences in binding.

404         The finding that PilB plays a key role in adhesion of *S. sanguinis* to host cells  
405 and structures, via its vWA module, has implications for the pathogenesis of this  
406 species in particular, and for our understanding of T4P-mediated adhesion in  
407 general. Our findings are consistent with the possibility that PilB-mediated adhesion  
408 to host proteins might play a role in IE<sup>41</sup>, a life-threatening infection often caused by  
409 *S. sanguinis*. Indeed, during IE, bacteria that have gained access to the bloodstream

410 adhere to pre-existing sites of valvular damage where sub-endothelial ECM proteins  
411 are exposed, and a blood clot is present, containing large amounts of platelets,  
412 fibrinogen/fibrin, and fibronectin<sup>42</sup>. Our finding that PilB adheres directly to two of  
413 these proteins, but additional ligands cannot be excluded, suggests that PilB might  
414 be important at this early stage in IE, which could be tested in future studies. Our  
415 findings, which arguably make PilB the best characterised T4P adhesin alongside  
416 PilC/PilY1 found in diderm T4aP<sup>43-47</sup>, have general implications for our understanding  
417 of T4P-mediated adhesion. The vWA module in PilB, which is most likely exposed at  
418 the pilus tip, is ideally placed to maximise bacterial adhesion to host protein  
419 receptors. T4P spring-like properties (gonococcal T4P can be stretched 3 times their  
420 length, which is a reversible process<sup>48</sup>) are expected to help bacteria that are bound  
421 via a tip-located adhesin, such as PilB, to withstand adverse forces in their particular  
422 environment, *e.g.*, blood flow in a heart valve. This is likely to apply to other modular  
423 pilins as well, which harbour different modules predicted to function in adhesion. The  
424 parallel with the best characterised T4P adhesin PilC/PilY1 is obvious. This protein,  
425 which is not a pilin, is an adhesin that has been proposed to be presented at the T4P  
426 tip<sup>44</sup> via its interaction with a tip-located complex of four widely conserved minor  
427 pilins<sup>49</sup>. All PilC/PilY1 have in common a C-terminal IPR008707  $\beta$ -propeller domain  
428 while their N-termini are different<sup>50</sup>. Since this is analogous to the situation with  
429 modular pilins, we wondered whether it could be an indication of a modular design for  
430 PilC/PilY1. This indeed seems to be the case since a search of the InterPro  
431 database<sup>29</sup> for all the proteins with an IPR008707 domain shows that 68 different  
432 PilC/PilY1 modular architectures are detected (Supplementary data 2). Strikingly,  
433 many of the N-terminal modules in PilC/PilY1 are shared with modular pilins. These  
434 observations suggest that the same tinkering strategy has been used both by pilins  
435 and PilC/PilY1 to increase the functional versatility of T4P. In both instances, a  
436 "carrier" module for presentation at the tip of the filaments (either a pilin, or an

437 IPR008707 domain that interacts with a tip-located complex of minor pilins) has been  
438 fused to variety of "effector" modules, directly involved in a variety of functions.

439 In conclusion, by performing a detailed structure/function of the minor pilin PilB  
440 from *S. sanguinis*, we have shed light on several aspects of T4P biology. Our  
441 findings are not only of relevance for *S. sanguinis*, most notably for colonisation of its  
442 human host, they have general implications for T4P/T4F by uncovering a prevalent  
443 strategy used by these widespread filamentous nanomachines to promote their well-  
444 known exceptional functional versatility<sup>1</sup>. The resulting conceptual framework paves  
445 the way for further investigations, which will indubitably improve our understanding of  
446 these fascinating filaments.

447 **MATERIALS AND METHODS**

448

449 **Strains and growth conditions**

450 Strains and plasmids used in this study are listed in Table S1. For cloning, we used  
451 *E. coli* DH5 $\alpha$ . For protein purification we used *E. coli* BL21(DE3) or *E. coli* BL21  
452 B834(DE3). *E. coli* was grown in liquid or solid Lysogenic Broth (LB) (Difco)  
453 containing, when required, 100  $\mu$ g/ml spectinomycin or 50  $\mu$ g/ml kanamycin (both  
454 from Sigma). For purification of protein labelled with seleno-methionine (SeMet),  
455 bacteria were grown in chemically defined medium (CDM) supplemented with 20  
456 mg/ml SeMet (Sigma). Chemically competent *E. coli* cells were prepared as  
457 described<sup>51</sup>. DNA manipulations were done using standard molecular biology  
458 techniques<sup>52</sup>. All PCR were done using high-fidelity DNA polymerases (Agilent).  
459 Primers used in this study are listed in Table S2. The pET-28b (Novagen) derivative,  
460 pET28-*pilB*<sub>36-461</sub> for expressing 6His-PilB<sub>36-461</sub> was described previously<sup>17</sup>. In this  
461 plasmid, the portion of a synthetic *pilB* gene codon-optimised for expression in *E.*  
462 *coli*, encoding the soluble portion of PilB, was fused to a non-cleavable N-terminal  
463 6His tag. Similarly, we constructed pET28-*pilB*<sub>192-461</sub> for expressing PilB<sub>VWA</sub>. To  
464 construct pET28-*pilB*<sub>D319A</sub> for expressing 6His-PilB<sub>D319A</sub>, we introduced a missense  
465 mutation in pET28-*pilB*<sub>36-461</sub> using QuickChange site-directed mutagenesis (Agilent).

466 The WT *S. sanguinis* 2908 strain and deletion mutants ( $\Delta$ *pilD*,  $\Delta$ *pilB*) were  
467 described previously<sup>16</sup>. *S. sanguinis* was grown on plates containing Todd Hewitt  
468 (TH) broth (Difco) and 1% agar (Difco), incubated at 37°C in anaerobic jars (Oxoid)  
469 under anaerobic conditions generated using Anaerogen sachets (Oxoid). Liquid  
470 cultures were grown statically under aerobic conditions in THT, *i.e.*, TH broth  
471 containing 0.05% tween 80 (Merck) to limit bacterial clumping. When required, 500  
472  $\mu$ g/ml kanamycin was used for selection and 15 mM *p*-Cl-Phe (Sigma) for  
473 counterselection<sup>53</sup>. *S. sanguinis* genomic DNA was prepared from overnight (O/N)  
474 liquid cultures using the kit XIT Genomic DNA from Gram-Positive Bacteria (G-

475 Biosciences). Strain 2908, which is naturally competent, was transformed as  
476 described<sup>16,53</sup>. The unmarked *S. sanguinis pilB<sub>D319A</sub>* mutant was constructed using a  
477 previously described two-step, cloning-independent, gene editing strategy<sup>53</sup>. In brief,  
478 in the first step, we replaced the gene in the WT by a promoterless *pheS\*aphA-3*  
479 double cassette, which confers sensitivity to *p*-Cl-Phe and resistance to kanamycin.  
480 To do this, we fused by splicing PCR the upstream and downstream regions flanking  
481 *pilB* to *pheS\*aphA-3*, directly transformed the PCR product into the WT, and selected  
482 allelic exchange mutants on kanamycin plates. Allelic exchange was confirmed by  
483 PCR. In the second step, we replaced the *pheS\*aphA-3* double cassette in this  
484 primary mutant by allelic exchange, with an unmarked *pilB<sub>D319A</sub>* mutation. To do this,  
485 we first constructed the missense mutation by site-directed mutagenesis, using as a  
486 template a pCR8/GW/TOPO (Invitrogen) derivative in which the WT gene was  
487 cloned. Then, the PCR product was directly transformed into the primary mutant, with  
488 plating on *p*-Cl-Phe-containing plates. Markerless allelic exchange mutants, which  
489 are the only one sensitive to kanamycin, were identified by re-streaking colonies on  
490 TH plates with and without antibiotic.

491

## 492 **Protein purification**

493 To purify native PilB, PilB<sub>D319A</sub> and PilB<sub>WVA</sub> proteins, the corresponding pET-28b  
494 derivatives were transformed in *E. coli* BL21(DE3). Transformants were grown O/N at  
495 37°C in liquid LB with kanamycin. The next day, this culture was diluted (1/500) in 1 l  
496 of the same medium and grown at 37°C to an OD<sub>600</sub> of 0.4-0.6. The temperature was  
497 then set to 16°C, the culture allowed to cool for 30 min, before protein expression  
498 was induced O/N by adding 0.5 mM IPTG (Merck). The next day, cells were  
499 harvested by centrifugation at 8,000 *g* for 20 min and subjected to one -80°C  
500 freeze/thaw cycle in binding buffer (50 mM HEPES pH 7.4, 200 mM NaCl, 15 mM  
501 imidazole), to which we added SIGMAFAST EDTA-free protease inhibitor cocktail  
502 (Sigma). Cells were disrupted by repeated cycles of sonication, *i.e.*, pulses of 5 sec

503 on and 5 sec off during 3-5 min, until the cell suspension was visibly less viscous.  
504 The cell lysate was then centrifuged for 30 min at 17,000 g to remove cell debris. The  
505 clarified lysate was first affinity-purified on an ÄKTA Purifier using His-Trap HP  
506 columns (GE Healthcare) and eluted with elution buffer (50 mM HEPES pH 7.4, 200  
507 mM NaCl, 300 mM imidazole). Affinity-purified proteins were further purified, and  
508 simultaneously buffer-exchanged into (50 mM HEPES pH 7.4, 200 mM NaCl), by gel-  
509 filtration chromatography on an ÄKTA Purifier using a Superdex 75 10/300 GL  
510 column (GE Healthcare). Protein concentration was quantified spectrophotometrically  
511 using a NanoDrop.

512 To purify SeMet-labelled PilB for phasing, the corresponding pET-28b  
513 derivative was transformed in *E. coli* BL21 B834(DE3). Transformants were grown at  
514 37°C in liquid LB with kanamycin, until OD<sub>600</sub> reached 0.6-0.7. Next, the cells were  
515 pelleted at 8,000 g for 5 min, and washed twice with 2 ml of CDM, which contains no  
516 Met. The pellet was then washed with 2 ml of CDM supplemented with 20 mg/ml L-  
517 Met (Sigma) and used to inoculate, at 1/200 dilution, 20 ml of CDM supplemented  
518 with 20 mg/ml Met. This culture was grown at 37°C for 16-18 h. Cells were pelleted  
519 and washed three times with CDM. Then, the pellet was re-suspended in 20 ml of  
520 CDM supplemented with 20 mg/ml SeMet, which was used to inoculate 1 l of CDM  
521 supplemented with SeMet. Cells were grown at 37°C until OD<sub>600</sub> reached 0.5-0.7.  
522 The temperature was then set to 16°C, the culture allowed to cool for 30 min, before  
523 protein expression was induced O/N by adding 1 mM IPTG (Merck) and 4 ml of 36 %  
524 glucose (w/v). Two and half hours later, we again added 4 ml of 36 % glucose to the  
525 culture. The next day, SeMet-labelled PilB was purified as above.

526

## 527 **Crystallisation and structure determination**

528 Purified proteins in 50 mM HEPES pH 7.4, 200 mM NaCl were concentrated to 50  
529 mg/ml and tested for crystallisation using sitting-drop vapor diffusion, with 100 nl  
530 drops of protein solution and mother liquor. We tested a range of commercially

531 available kits (Molecular Dimensions, Hampton Research and Rigaku Reagents),  
532 which yielded a number of hits, mainly in high salt conditions. Crystallisation  
533 conditions were optimised to yield larger and better diffracting crystals. The PilB  
534 crystals used for the high-resolution structure determination were obtained when the  
535 purified protein was mixed 1:1 with crystallisation liquor (0.1 M Bis-tris propane pH 7,  
536 3 M NaCl). The PilB<sub>D319A</sub> crystals were obtained with crystallisation liquor (0.1 M Bis-  
537 tris pH 6.5, 3 M NaCl). Crystals were cryoprotected with 30% glycerol in  
538 crystallisation liquor, and flash-frozen in liquid nitrogen. All data was collected and  
539 processed using the Diamond Light Source beamline i03, and integrated in *P6<sub>1</sub>* using  
540 the 3dii pipeline in *xia2*<sup>54</sup>. Initial molecular replacement was performed with Phaser<sup>55</sup>  
541 on the 2.26 Å resolution PilB dataset using a low-resolution partial model produced  
542 from the SeMet data using autoSHARP<sup>56</sup>. Manual building in Coot<sup>57</sup> was performed  
543 on the high-resolution dataset, and the full model was then used for molecular  
544 replacement in the low-resolution datasets. All structures were produced using Coot  
545 and phenix.refine<sup>58</sup> and validated using MolProbity<sup>59</sup>.

546

#### 547 **Assaying metal-binding by purified PilB**

548 The metal binding specificity of PilB was tested using ThermoFluor, a fluorescent-  
549 based method measuring changes in thermal denaturation temperature<sup>27</sup>. Assays  
550 were done in a 96-well plate (Applied Biosystems) format. In the wells, we added to a  
551 final volume of 40 µl (i) 0-1 mM range of concentrations of MgCl<sub>2</sub>, MnCl<sub>2</sub> and CaCl<sub>2</sub>,  
552 (ii) 20 µM purified PilB or PilB<sub>D319A</sub>, and (iii) 1/5,000 dilution of SYBR Orange (Thermo  
553 Fisher Scientific). Plates were then analysed using a temperature gradient, from 25  
554 to 99 °C, on a StepOnePlus real-time qPCR machine (Applied Biosystems). The data  
555 were exported MATLAB and analysed in GraphPad. Analyses were performed with  
556 Prism (GraphPad Software). K<sub>d</sub> were calculated using non-linear regression fits,  
557 applying saturation binding equation (One site - Total and non-specific binding) using  
558 Ca<sup>2+</sup> as non-specific binding control.

559

### 560 **Assaying protein ligand-binding by purified PilB**

561 Binding of PilB, PilB<sub>VWA</sub>, PilB<sub>D319A</sub> to a variety of eukaryotic proteins was tested by  
562 ELISA as follows. Putative ligand proteins (elastin from human skin, fibrinogen from  
563 human plasma, laminin from human placenta, fibronectin from human plasma) (all  
564 from Sigma) were resuspended in carbonate-bicarbonate buffer (Sigma) at 5 µg/ml.  
565 Fifty µl was dispatched into the wells of MaxiSorp plates, and adsorbed O/N at 4°C.  
566 Wells were washed three times with PBS (Gibco) and blocked during 1 h with 3 %  
567 BSA (Probumin) or 1% gelatin (Sigma) in PBS. After washing with PBST (PBS  
568 containing 0.05 % tween 20), serial twofold dilutions of PilB (from 40 to 0.625 µg/ml)  
569 were added to the wells and incubated for 2 h at 37°C. After five washes with PBST,  
570 we added 50 µl anti-6His RTM antibody (Abcam) at 1/500 dilution in PBS, and  
571 incubated for 1 h at RT. After five washes with PBST, we added 50 µl Amersham  
572 ECL anti-rabbit IgG HRP-linked whole antibody (GE Healthcare) at 1/500 dilution in  
573 PBS, and incubated for 1 h at RT. After five washes with PBST, we added 100 µl/well  
574 of TMB solution (Thermo Scientific) and incubated the plates during 20 min at RT in  
575 the dark. Finally, we stopped the reaction by adding 100 µl/well of 0.18 M sulfuric  
576 acid, before reading the plates at 450 nm using a plate reader. Analyses were  
577 performed with Prism (GraphPad Software). Kd were calculated using non-linear  
578 regression fits, applying saturation binding equation (One site - Total and non-  
579 specific binding) using BSA or gelatin as non-specific binding control.

580

### 581 **Assaying piliation of *S. sanguinis***

582 *S. sanguinis* T4P were purified as described<sup>16,17</sup>. In brief, bacteria grown in THT until  
583 the OD<sub>600</sub> reached 1-1.5, at which point OD were normalised, a were pelleted and re-  
584 suspended in pilus buffer (20 mM Tris, pH 7.5, 50 mM NaCl). This suspension was  
585 vortexed for 2 min at full speed to shear T4P. After removing bacterial cells by two  
586 centrifugation steps and filtration through a 0.22 µm pore size syringe filter



587 (Millipore), pili were pelleted by ultracentrifugation. Pili were resuspended in pilus  
588 buffer, separated by SDS-PAGE, before gels were stained with Bio-Safe Coomassie  
589 (Bio-Rad).

590

#### 591 **Assaying twitching motility of *S. sanguinis***

592 Twitching motility was assessed on agar plates as described<sup>16</sup>. In brief, bacteria  
593 grown O/N were streaked as straight lines on freshly poured TH plates containing 1%  
594 Eiken agar (Eiken Chemicals). Plates were grown for several days at 37°C in  
595 anaerobic condition under high humidity, which is necessary for twitching. Plates  
596 were then photographed using an Epson Perfection V700 photo scanner.

597

#### 598 **Assaying adhesion of *S. sanguinis* to eukaryotic cells**

599 We tested adhesion of *S. sanguinis* to CHO cells (Public Health England) as follows.  
600 Cells were replicated in flasks in DMEM medium (Gibco) containing 1 x MEM non-  
601 essential aa mix (Gibco) and 5 % fetal bovine serum (Gibco) and seeded at 100,000  
602 cells/cm<sup>2</sup> in 24-well plates, which were incubated O/N at 37°C in the presence of 5%  
603 CO<sub>2</sub>. The next day, cell monolayers were gently rinsed with PBS, and infected at an  
604 MOI of 10 with bacteria grown in TH. In brief, bacteria were grown for a few hours to  
605 OD<sub>600</sub> 0.5 units, adjusted at the same OD, pelleted by centrifugation at 1,100 g during  
606 10 min, and resuspended in PBS. Bacteria in the inoculum were quantified by  
607 performing CFU counts on TH plates. After 1h of infection at 37°C, cell monolayers  
608 were gently rinsed four times with PBS, before cells with adherent bacteria were  
609 scraped in distilled water. Adherent bacteria were then quantified by performing CFU  
610 counts. Statistical analyses were performed with Prism. Comparisons were done by  
611 one-way ANOVA, followed by Dunnett's multiple comparison tests. An adjusted *P*  
612 value < 0.05 was considered significant (\* *P*<0.05, \*\* *P*<0.01, \*\*\* *P*<0.001, \*\*\*\*  
613 *P*<0.0001).

614

615 **Bioinformatics**

616 Protein sequences were routinely analysed using DNA Strider<sup>60</sup>. Prediction of protein  
617 domains, their global distribution and associated architectures was done by using  
618 InterProScan<sup>29</sup> to interrogate the InterPro database. This database was also used to  
619 download all the protein entries discussed in this paper. Molecular visualisation of  
620 protein 3D structures was done using PyMOL (Schrödinger). The PDBsum  
621 Generate<sup>61</sup> server was used to provide at-a-glance overviews – secondary structure,  
622 topology diagram, protein motifs, schematic diagram of metal-protein interactions – of  
623 the 3D structures determined during this work. The DALI<sup>62</sup> server was used for  
624 comparing protein structures in 3D. Protein 3D structures were downloaded from the  
625 RCSB PDB server. The 3d-SS<sup>63</sup> server was used to superpose 3D protein structures.

626 The cryo-EM structure of *N. meningitidis* T4P (PDB 5KUA)<sup>9</sup> was used to model,  
627 using SWISS-MODEL<sup>64</sup>, the N-terminal helices of PilE1, PilE2 and PilB within the  
628 filaments. Coot and PyMOL were then used to place the full-length structures within  
629 the T4P model.

630 **DATA AVAILABILITY**

631 The 3D structures determined during this study have been deposited in the PDB,  
632 under accession codes 7B7P for PilB, and 7BA2 for PilB<sub>D319A</sub>. All the datasets  
633 generated during this study are included in this paper and its Supplementary  
634 information. Source data are provided. The InterPro database  
635 (<http://www.ebi.ac.uk/interpro>) was used to identify modular pilin architectures. The  
636 DALI server (<http://ekhidna2.biocenter.helsinki.fi/dali>) was used for comparing protein  
637 3D structures. The PDBsum Generate server ([https://www.ebi.ac.uk/thornton-](https://www.ebi.ac.uk/thornton-srv/databases/pdbsum/Generate.html)  
638 [srv/databases/pdbsum/Generate.html](https://www.ebi.ac.uk/thornton-srv/databases/pdbsum/Generate.html)) was used to generate analytical overviews of  
639 the 3D structures we have determined. The 3d-SS server  
640 (<http://cluster.physics.iisc.ernet.in/3dss>) was used for 3D superposition of protein  
641 structures. The RCSB PDB server (<https://www.rcsb.org>) was used to download x3D  
642 structures of proteins.

643 **REFERENCES**

- 644 1. Berry, J.L. & Pelicic, V. Exceptionally widespread nano-machines composed  
645 of type IV pilins: the prokaryotic Swiss Army knives. *FEMS Microbiology Reviews* **39**,  
646 134-154 (2015).
- 647 2. Denise, R., Abby, S.S. & Rocha, E.P.C. Diversification of the type IV filament  
648 superfamily into machines for adhesion, protein secretion, DNA uptake, and motility.  
649 *PLoS Biology* **17**, e3000390 (2019).
- 650 3. Pelicic, V. Type IV pili: *e pluribus unum?* *Molecular Microbiology* **68**, 827-837  
651 (2008).
- 652 4. Giltner, C.L., Nguyen, Y. & Burrows, L.L. Type IV pilin proteins: versatile  
653 molecular modules. *Microbiology and Molecular Biology Reviews* **76**, 740-72 (2012).
- 654 5. LaPointe, C.F. & Taylor, R.K. The type 4 prepilin peptidases comprise a novel  
655 family of aspartic acid proteases. *Journal of Biological Chemistry* **275**, 1502-10  
656 (2000).
- 657 6. Francetic, O., Buddelmeijer, N., Lewenza, S., Kumamoto, C.A. & Pugsley,  
658 A.P. Signal recognition particle-dependent inner membrane targeting of the PulG  
659 pseudopilin component of a type II secretion system. *Journal of Bacteriology* **189**,  
660 1783-93 (2007).
- 661 7. Arts, J., van Boxtel, R., Filloux, A., Tommassen, J. & Koster, M. Export of the  
662 pseudopilin XcpT of the *Pseudomonas aeruginosa* type II secretion system via the  
663 signal recognition particle-Sec pathway. *Journal of Bacteriology* **189**, 2069-76 (2007).
- 664 8. Chang, Y.W. *et al.* Architecture of the type IVa pilus machine. *Science* **351**,  
665 aad2001 (2016).
- 666 9. Kolappan, S. *et al.* Structure of the *Neisseria meningitidis* type IV pilus.  
667 *Nature Communications* **7**, 13015 (2016).
- 668 10. Wang, F. *et al.* Cryoelectron microscopy reconstructions of the *Pseudomonas*  
669 *aeruginosa* and *Neisseria gonorrhoeae* type IV pili at sub-nanometer resolution.  
670 *Structure* **25**, 1423-1435 (2017).

- 671 11. Merz, A.J., So, M. & Sheetz, M.P. Pilus retraction powers bacterial twitching  
672 motility. *Nature* **407**, 98-102 (2000).
- 673 12. Maier, B. *et al.* Single pilus motor forces exceed 100 pN. *Proceedings of the*  
674 *National Academy of Sciences of the United States of America* **99**, 16012-7 (2002).
- 675 13. Biais, N., Ladoux, B., Higashi, D., So, M. & Sheetz, M. Cooperative retraction  
676 of bundled type IV pili enables nanonewton force generation. *PLoS Biology* **6**, e87  
677 (2008).
- 678 14. Melville, S. & Craig, L. Type IV pili in Gram-positive bacteria. *Microbiology*  
679 *and Molecular Biology Reviews* **77**, 323-41 (2013).
- 680 15. Pelicic, V. Monoderm bacteria: the new frontier for type IV pilus biology.  
681 *Molecular Microbiology* **112**, 1674-1683 (2019).
- 682 16. Gurung, I. *et al.* Functional analysis of an unusual type IV pilus in the Gram-  
683 positive *Streptococcus sanguinis*. *Molecular Microbiology* **99**, 380-392 (2016).
- 684 17. Berry, J.L. *et al.* Global biochemical and structural analysis of the type IV pilus  
685 from the Gram-positive bacterium *Streptococcus sanguinis*. *Journal of Biological*  
686 *Chemistry* **294**, 6796-6808 (2019).
- 687 18. Whittaker, C.A. & Hynes, R.O. Distribution and evolution of von  
688 Willebrand/integrin A domains: widely dispersed domains with roles in cell adhesion  
689 and elsewhere. *Molecular Biology of the Cell* **13**, 3369-87 (2002).
- 690 19. Sadler, J.E. Biochemistry and genetics of von Willebrand factor. *Annual*  
691 *Review of Biochemistry* **67**, 395-424 (1998).
- 692 20. Lee, J.O., Rieu, P., Arnaout, M.A. & Liddington, R. Crystal structure of the A  
693 domain from the alpha subunit of integrin CR3 (CD11b/CD18). *Cell* **80**, 631-8 (1995).
- 694 21. Dickeson, S.K. & Santoro, S.A. Ligand recognition by the I domain-containing  
695 integrins. *Cellular and Molecular Life Sciences* **54**, 556-66 (1998).
- 696 22. Craig, L. *et al.* Type IV pilin structure and assembly. X-ray and EM analyses  
697 of *Vibrio cholerae* toxin-coregulated pilus and *Pseudomonas aeruginosa* PAK pilin.  
698 *Molecular Cell* **11**, 1139-50 (2003).

- 699 23. Hutchinson, E.G. & Thornton, J.M. HERA—a program to draw schematic  
700 diagrams of protein secondary structures. *Proteins* **8**, 203-12 (1990).
- 701 24. Qu, A. & Leahy, D.J. Crystal structure of the I-domain from the CD11a/CD18  
702 (LFA-1,  $\alpha$ L $\beta$ 2) integrin. *Proceedings of the National Academy of Sciences of the*  
703 *United States of America* **92**, 10277-81 (1995).
- 704 25. Romijn, R.A. *et al.* Identification of the collagen-binding site of the von  
705 Willebrand factor A3-domain. *Journal of Biological Chemistry* **276**, 9985-91 (2001).
- 706 26. Izoré, T. *et al.* Structural basis of host cell recognition by the pilus adhesin  
707 from *Streptococcus pneumoniae*. *Structure* **18**, 106-15 (2010).
- 708 27. Niesen, F.H., Berglund, H. & Vedadi, M. The use of differential scanning  
709 fluorimetry to detect ligand interactions that promote protein stability. *Nature*  
710 *Protocols* **2**, 2212-21 (2007).
- 711 28. Kreth, J., Giacaman, R.A., Raghavan, R. & Merritt, J. The road less traveled -  
712 defining molecular commensalism with *Streptococcus sanguinis*. *Molecular Oral*  
713 *Microbiology* **32**, 181-196 (2017).
- 714 29. Jones, P. *et al.* InterProScan 5: genome-scale protein function classification.  
715 *Bioinformatics* **30**, 1236-40 (2014).
- 716 30. Kolappan, S., Ng, D., Yang, G., Harn, T. & Craig, L. Crystal structure of the  
717 minor pilin CofB, the initiator of CFA/III pilus assembly in enterotoxigenic *Escherichia*  
718 *coli*. *Journal of Biological Chemistry* **290**, 25805-18 (2015).
- 719 31. Kawahara, K. *et al.* Homo-trimeric structure of the type IVb minor pilin CofB  
720 suggests mechanism of CFA/III pilus assembly in human enterotoxigenic *Escherichia*  
721 *coli*. *Journal of Molecular Biology* **428**, 1209-1226 (2016).
- 722 32. Oki, H. *et al.* Interplay of a secreted protein with type IVb pilus for efficient  
723 enterotoxigenic *Escherichia coli* colonization. *Proceedings of the National Academy*  
724 *of Sciences of the United States of America* (2018).

- 725 33. Salleh, M.Z. *et al.* Structure and properties of a natural competence-  
726 associated pilin suggest a unique pilus tip-associated DNA receptor. *mBio* **10**,  
727 e00614-19 (2019).
- 728 34. Korotkov, K.V. & Hol, W.G. Structure of the GspK-GspI-GspJ complex from  
729 the enterotoxigenic *Escherichia coli* type 2 secretion system. *Nature Structural and*  
730 *Molecular Biology* **15**, 462-8 (2008).
- 731 35. Hilleringmann, M. *et al.* Pneumococcal pili are composed of protofilaments  
732 exposing adhesive clusters of RrgA. *PLoS Pathogens* **4**, e1000026 (2008).
- 733 36. Telford, J.L., Barocchi, M.A., Margarit, I., Rappuoli, R. & Grandi, G. Pili in  
734 Gram-positive pathogens. *Nature Reviews in Microbiology* **4**, 509-19 (2006).
- 735 37. Baldwin, E.T. *et al.* Cation binding to the integrin CD11b I domain and  
736 activation model assessment. *Structure* **6**, 923-35 (1998).
- 737 38. Qu, A. & Leahy, D.J. The role of the divalent cation in the structure of the I  
738 domain from the CD11a/CD18 integrin. *Structure* **4**, 931-42 (1996).
- 739 39. Konto-Ghiorgi, Y. *et al.* Dual role for pilus in adherence to epithelial cells and  
740 biofilm formation in *Streptococcus agalactiae*. *PLoS Pathogens* **5**, e1000422 (2009).
- 741 40. Nielsen, H.V. *et al.* The metal ion-dependent adhesion site motif of the  
742 *Enterococcus faecalis* EbpA pilin mediates pilus function in catheter-associated  
743 urinary tract infection. *MBio* **3**, e00177-12 (2012).
- 744 41. Que, Y.A. & Moreillon, P. Infective endocarditis. *Nature Reviews Cardiology*  
745 **8**, 322-36 (2011).
- 746 42. Werdan, K. *et al.* Mechanisms of infective endocarditis: pathogen-host  
747 interaction and risk states. *Nature Reviews Cardiology* **11**, 35-50 (2014).
- 748 43. Nassif, X. *et al.* Roles of pilin and PilC in adhesion of *Neisseria meningitidis* to  
749 human epithelial and endothelial cells. *Proceedings of the National Academy of*  
750 *Sciences of the United States of America* **91**, 3769-3773 (1994).
- 751 44. Rudel, T., Scheuerpflug, I. & Meyer, T.F. *Neisseria* PilC protein identified as a  
752 type-4 pilus-tip located adhesin. *Nature* **373**, 357-359 (1995).

- 753 45. Heiniger, R.W., Winther-Larsen, H.C., Pickles, R.J., Koomey, M. & Wolfgang,  
754 M.C. Infection of human mucosal tissue by *Pseudomonas aeruginosa* requires  
755 sequential and mutually dependent virulence factors and a novel pilus-associated  
756 adhesin. *Cellular Microbiology* **12**, 1158-73 (2010).
- 757 46. Johnson, M.D. *et al.* *Pseudomonas aeruginosa* PilY1 binds integrin in an  
758 RGD- and calcium-dependent manner. *PLoS One* **6**, e29629 (2011).
- 759 47. Porsch, E.A. *et al.* Calcium binding properties of the *Kingella kingae* PilC1  
760 and PilC2 proteins have differential effects on type IV pilus-mediated adherence and  
761 twitching motility. *Journal of Bacteriology* **195**, 886-95 (2013).
- 762 48. Biais, N., Higashi, D.L., Brujic, J., So, M. & Sheetz, M.P. Force-dependent  
763 polymorphism in type IV pili reveals hidden epitopes. *Proceedings of the National*  
764 *Academy of Sciences of the United States of America* **107**, 11358-63 (2010).
- 765 49. Treuner-Lange, A. *et al.* PilY1 and minor pilins form a complex priming the  
766 type IVa pilus in *Myxococcus xanthus*. *Nature Communications* **11**, 5054 (2020).
- 767 50. Orans, J. *et al.* Crystal structure analysis reveals *Pseudomonas* PilY1 as an  
768 essential calcium-dependent regulator of bacterial surface motility. *Proceedings of*  
769 *the National Academy of Sciences of the United States of America* **107**, 1065-70  
770 (2010).
- 771 51. Inoue, H., Nojima, H. & Okayama, H. High efficiency transformation of  
772 *Escherichia coli* with plasmids. *Gene* **96**, 23-8 (1990).
- 773 52. Sambrook, J. & Russell, D.W. *Molecular cloning. A laboratory manual*, (Cold  
774 Spring Harbor Laboratory Press, Cold Spring Harbor, New York, 2001).
- 775 53. Gurung, I., Berry, J.L., Hall, A.M.J. & Pelicic, V. Cloning-independent  
776 markerless gene editing in *Streptococcus sanguinis*: novel insights in type IV pilus  
777 biology. *Nucleic Acids Research* **45**, e40 (2017).
- 778 54. Winter, G., Lobley, C.M. & Prince, S.M. Decision making in *xia2*. *Acta*  
779 *Crystallographica Section D Biological Crystallography* **69**, 1260-73 (2013).



- 780 55. McCoy, A.J. *et al.* Phaser crystallographic software. *Journal of Applied*  
781 *Crystallography* **40**, 658-674 (2007).
- 782 56. Vonrhein, C., Blanc, E., Roversi, P. & Bricogne, G. Automated structure  
783 solution with autoSHARP. *Methods in Molecular Biology* **364**, 215-30 (2007).
- 784 57. Emsley, P., Lohkamp, B., Scott, W.G. & Cowtan, K. Features and  
785 development of Coot. *Acta Crystallographica Section D Biological Crystallography*  
786 **66**, 486-501 (2010).
- 787 58. Afonine, P.V. *et al.* Towards automated crystallographic structure refinement  
788 with phenix.refine. *Acta Crystallographica Section D Biological Crystallography* **68**,  
789 352-67 (2012).
- 790 59. Chen, V.B. *et al.* MolProbity: all-atom structure validation for macromolecular  
791 crystallography. *Acta Crystallographica Section D Biological Crystallography* **66**, 12-  
792 21 (2010).
- 793 60. Marck, C. 'DNA Strider': a 'C' program for the fast analysis of DNA and protein  
794 sequences on the Apple Macintosh family of computers. *Nucleic Acids Research* **16**,  
795 1829-36 (1988).
- 796 61. Laskowski, R.A., Jablonska, J., Pravda, L., Varekova, R.S. & Thornton, J.M.  
797 PDBsum: Structural summaries of PDB entries. *Protein Science* **27**, 129-134 (2018).
- 798 62. Holm, L. & Laakso, L.M. Dali server update. *Nucleic Acids Research* **44**,  
799 W351-5 (2016).
- 800 63. Sumathi, K., Ananthalakshmi, P., Roshan, M.N. & Sekar, K. 3dSS: 3D  
801 structural superposition. *Nucleic Acids Research* **34**, W128-32 (2006).
- 802 64. Waterhouse, A. *et al.* SWISS-MODEL: homology modelling of protein  
803 structures and complexes. *Nucleic Acids Research* **46**, W296-W303 (2018).
- 804

805 **ACKNOWLEDGEMENTS**

806 This work was supported by funding from the MRC (MR/P022197/1) to V. P. We  
807 acknowledge the use of the crystallisation facility at Imperial College London, which  
808 was supported by BBSRC (BB/D524840/1) and the Wellcome Trust (202926/Z/16/Z).  
809 We thank Angelika Gründling (Imperial College London), Sophie Helaine (Harvard  
810 Medical School), Christoph Tang (University of Oxford), and Romé Voulhoux  
811 (Laboratoire de Chimie Bactérienne) for critical reading of the manuscript.

812 **AUTHOR CONTRIBUTIONS**

813 V. P. was responsible for conception and supervision of the work, and the  
814 computational studies. C. R., D. S., J. L. B., and I. G. performed the experimental  
815 studies. All authors contributed to writing of the manuscript

816 **COMPETING INTERESTS**

817 The authors declare no competing interests.

818 **Table 1. Crystal structures data collection and refinement statistics.**

| <b>Proteins</b>                      | <b>PilB<br/>(7B7P)</b> | <b>PilB<sub>D319A</sub><br/>(7BA2)</b> |
|--------------------------------------|------------------------|----------------------------------------|
| Maximum resolution (Å)               | 2.26                   | 3.00                                   |
| Space group                          | <i>P6<sub>1</sub></i>  | <i>P6<sub>1</sub></i>                  |
| Unit cell parameters                 |                        |                                        |
| a, b, c (Å)                          | 124.38, 124.38, 140.74 | 120.95, 120.95, 151.25                 |
| α, β, γ (°)                          | 90, 90, 120            | 90, 90, 120                            |
| Number of observations               | 329,504                | 208,399                                |
| Number of unique observations        | 57,372                 | 25,101                                 |
| R <sub>merge</sub> (%)               | 6.2                    | 16.6                                   |
| I/σ                                  | 13.4                   | 7.6                                    |
| CC ½                                 | 0.999                  | 0.998                                  |
| Resolution range used for refinement | 56.88 – 2.26           | 75.63 – 3.00                           |
| Completeness (%)                     | 99.4                   | 93.8                                   |
| R factor (%)                         | 20.5                   | 21.2                                   |
| Free R factor (%)                    | 23.7                   | 27.9                                   |
| Ramachandran favoured (%)            | 93.4                   | 83.6                                   |
| Ramachandran allowed (%)             | 6.4                    | 12.0                                   |
| Ramachandran outliers (%)            | 0.2                    | 4.4                                    |
| RMSD from ideal values               |                        |                                        |
| bond length (Å)                      | 0.008                  | 0.005                                  |
| bond angles (°)                      | 0.974                  | 1.043                                  |

819

820 **LEGENDS TO FIGURES**

821

822 **Fig. 1. Bioinformatic analysis of PilB.** **A)** Relevant features of PilB. The sequence  
823 is from *S. sanguinis* 2908. The N-terminal class III signal peptide, the defining feature  
824 of type IV pilins, is boxed. The 7-aa long leader peptide contains mostly hydrophilic  
825 (shaded in orange) and neutral (no shading) residues, and it ends with a conserved  
826 Gly. This leader peptide is processed by the prepilin peptidase PilD, which is  
827 indicated by the vertical arrow, generating a protein of 454 residues (50.5 kDa). The  
828 processed protein starts with a tract of 21 predominantly hydrophobic residues  
829 (shaded in blue), which invariably form an extended  $\alpha$ -helix that is the main assembly  
830 interface within filaments. The C-terminal vWA module (IPR002035) in PilB is boxed,  
831 with the conserved residues forming the MIDAS highlighted in yellow. Arrowheads  
832 indicate the proteins that were produced and purified in this study, consisting of either  
833 two modules (black arrowhead) or just the vWA module (red arrowhead). **B)** Modular  
834 architectures of PilB and PilC minor pilins compared to the major pilins PilE1/PilE2.  
835 The proteins, from *S. sanguinis* 2908, have been drawn to scale. The black rounded  
836 rectangles correspond to the IPR012902 motif that is part of the class III signal  
837 peptide. The C-terminal domains in PilB and PilC are highlighted by coloured  
838 rounded rectangles, vWA domain in PilB (red) and lectin domain in PilC (yellow).

839

840 **Fig. 2. Crystal structure of PilB.** **A)** Orthogonal cartoon views of the 6His-PilB  
841 structure in which the two distinct modules have been highlighted in blue (pilin  
842 module) and red (vWA module), while the short loop connecting them is in grey. The  
843 orange sphere represents a magnesium ion. **B)** Left, close-up cartoon view of the  
844 pilin module coloured in rainbow spectrum from blue (N-terminus) to red (C-  
845 terminus). Right, topology diagram of the pilin module structure. **C)** Left, close-up  
846 cartoon view of the vWA module in which the  $\beta$ -strands composing the central  $\beta$ -

847 sheet are highlighted in red, while the surrounding  $\alpha$ -helices are highlighted in yellow.  
848 The connecting loops are in grey, except for the two "arms" on top of the structure  
849 (coloured in orange and blue), which surround the MIDAS. Right, diagram of the  
850 magnesium coordination by the conserved MIDAS residues in the vWA module of  
851 PilB. Coordinating oxygen atoms are shown with dashed lines corresponding to  
852 hydrogen bonds.

853

854 **Fig. 3. 3D model of PilB in *S. sanguinis* T4P.** **A)** Packing of PilB (red) into *S.*  
855 *sanguinis* T4P, which is a right-handed helical heteropolymer of two major pilins  
856 PilE1 (blue) and PilE2 (grey). **B)** View of the T4P tip capped by PilB, or not.

857

858 **Fig. 4. Metal binding by PilB.** Purified PilB was incubated with increasing  
859 concentrations of divalent ions ( $\text{Ca}^{2+}$ ,  $\text{Mg}^{2+}$ ,  $\text{Mn}^{2+}$ ) and binding was quantified by  
860 ThermoFluor. **A)** Metal binding by PilB. **B)** Metal binding by PilB<sub>D319A</sub>, with an inactive  
861 MIDAS module. Results are the average  $\pm$  standard deviations from 3 independent  
862 experiments.

863

864 **Fig. 5. 3D crystal structure of PilB<sub>D319A</sub>.** **A)** Close-up cartoon view of the vWA  
865 module in PilB<sub>D319A</sub>. **B)** Comparison of electron density maps in the MIDAS pocket for  
866 the PilB<sub>D319A</sub> (upper panel) and PilB (lower panel) structures. **C)** Superposition of the  
867 vWA modules of PilB (grey) and PilB<sub>D319A</sub> (orange). The two structures superpose  
868 with an RMSD of 0.48 Å.

869

870 **Fig. 6. Phenotypic characterisation of a *S. sanguinis* mutant expressing**  
871 **PilB<sub>D319A</sub> with an inactive MIDAS.** **A)** Piliation was quantified by purifying T4P from  
872 cultures adjusted to the same OD<sub>600</sub>, using a shearing/ultracentrifugation procedure.  
873 Purified T4P (identical volumes were loaded in each lane) were separated by SDS-  
874 PAGE and stained with Coomassie blue. A molecular weight marker (MW) was run in

875 the first lane. Molecular weights are indicated in kDa. **B)** Twitching motility was  
876 assessed by a macroscopic motility assay. Bacteria were streaked on plates, which  
877 were incubated several days at 37°C in a humid atmosphere and then photographed.  
878 Twitching motility is characterised by spreading zones around colonies.

879

880 **Fig. 7. Adhesion of *S. sanguinis* to eukaryotic cells : testing the importance of**  
881 **T4P and the role of the MIDAS motif in PilB.** Bacteria were incubated with CHO  
882 cells (MOI 10) for 1 h. After removing non-adherent bacteria by several washes,  
883 bacteria adhering to cells were enumerated by performing CFU counts. Results are  
884 expressed as adhesion relative to WT (set to 1), and are the average  $\pm$  standard  
885 deviations from five independent experiments. For statistical analysis, one-way  
886 ANOVA followed by Dunnett's multiple comparison tests were performed ( $****P <$   
887 0.0001).

888

889 **Fig. 8. Dose-dependent binding of PilB to various protein ligands.** Increasing  
890 concentrations of purified PilB was added to constant concentrations of immobilised  
891 putative ligands, and binding was quantified by ELISA. BSA served as negative  
892 control. Results are the average  $\pm$  standard deviations from at least three  
893 independent experiments. **A)** Binding of PilB to fibrinogen, fibronectin, elastin, and  
894 laminin. **B)** Binding of PilB<sub>vWA</sub>, consisting only of the vWA module, to fibrinogen and  
895 fibronectin.

896

897 **Fig. 9. Global distribution of modular pilins.** The fifteen most widespread modular  
898 pilin architectures in the InterPro database are presented. The numbers in  
899 parenthesis represent the number of proteins displaying that architecture. The  
900 representative proteins depicted, drawn to scale, are from the following species. 1,  
901 *Candidatus* Magasanikbacteria (UniProtKB/TrEMBL protein A0A0G0IU57). 2,  
902 *Photorhabdus luminescens* (A0A022PI42). 3, *Desulfuribacillus stibiiarsenatis*



903 (A0A1E5L295). 4, *Candidatus* Falkowbacteria (A0A1J4TDE2). 5, *Candidatus*  
904 Wolfebacteria (A0A0G1WFE5). 6, Clostridiales bacterium (A0A101H8M7). 7,  
905 *Corynebacterium glutamicum* (A0A1Q6BQB1). 8, *Thermosulfidibacter takaii*  
906 (A0A0S3QUH2). 9, *Candidatus* Gracilibacteria (A0A1J5F7A7). 10, *Candidatus*  
907 Saccharibacteria (A0A1Q3NLQ9). 11, Planctomycetes bacterium (A0A1G2ZHU9).  
908 12, *Actinoplanes awajinensis* subsp. *mycoplanecinus* (A0A101J7V4). 13,  
909 *Actinoplanes derwentensis* (A0A1H2D7E9). 14, Desulfobacterales bacterium  
910 (A0A1V1WSE4). 15, Parcubacteria group bacterium (A0A2D6FLV5).

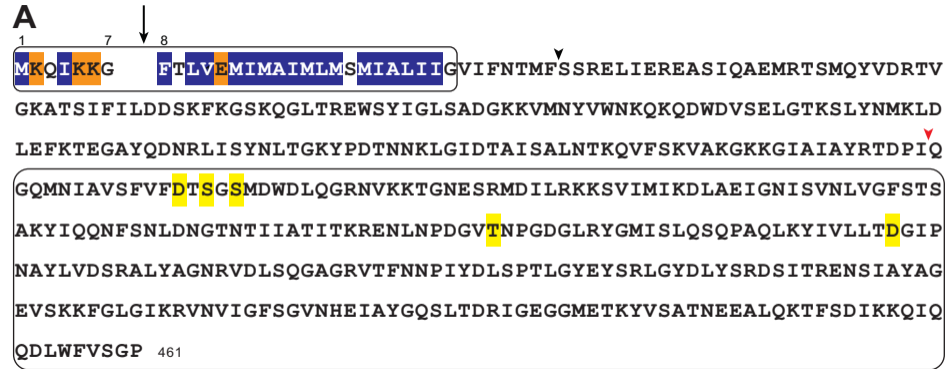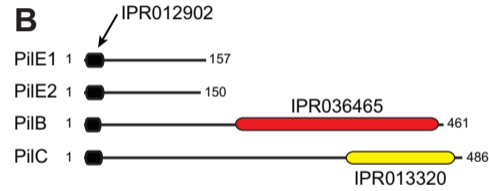

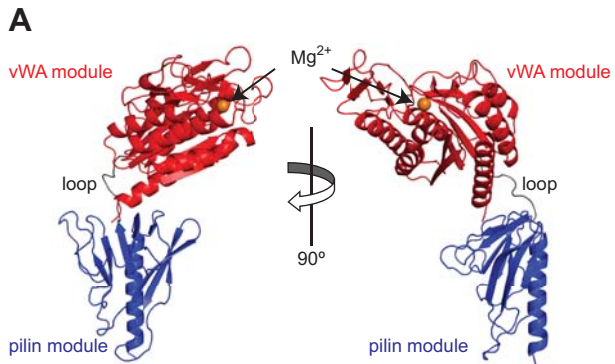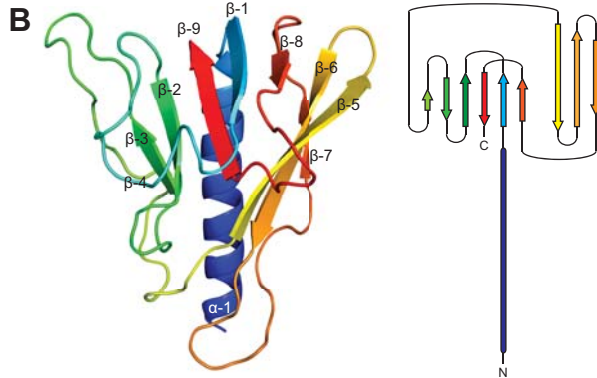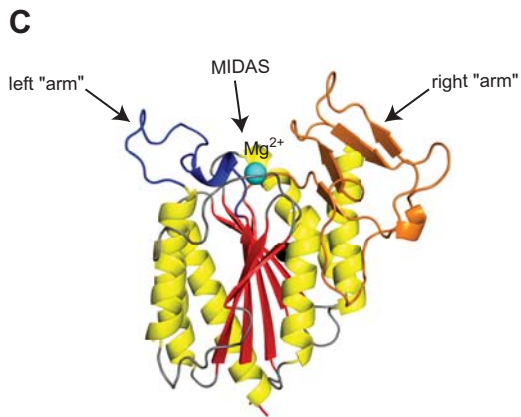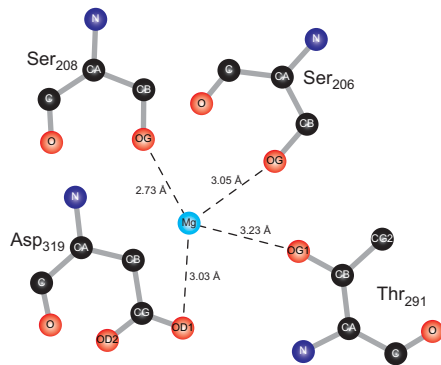

**A**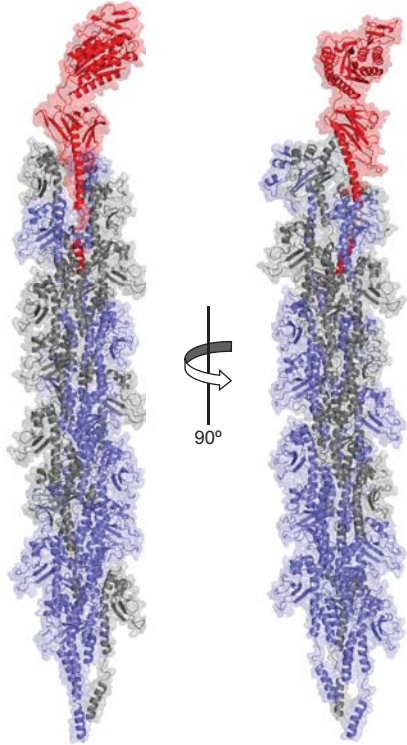**B**

pilus tip without PilB

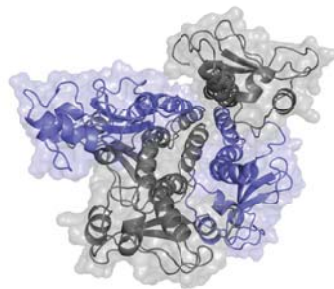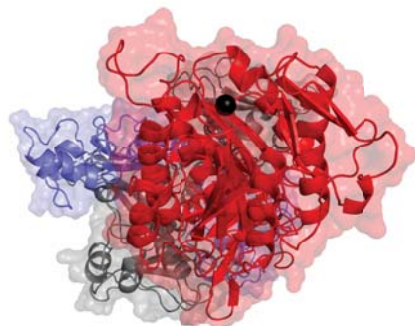

pilus tip with PilB

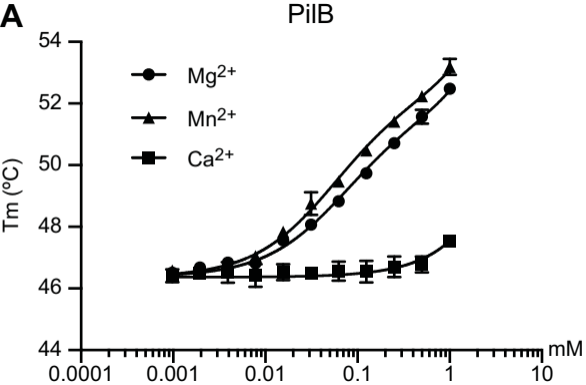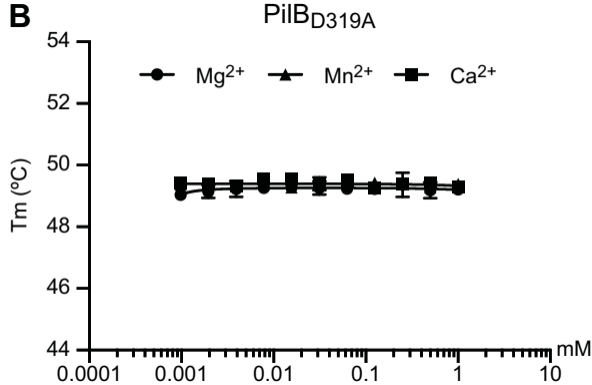

**A**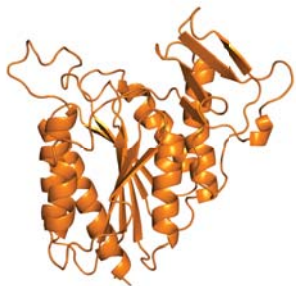

PiIB<sub>D319A</sub>

**C**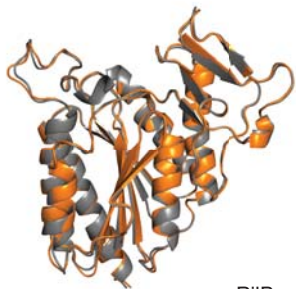

PiIB  
PiIB<sub>D319A</sub>

**B**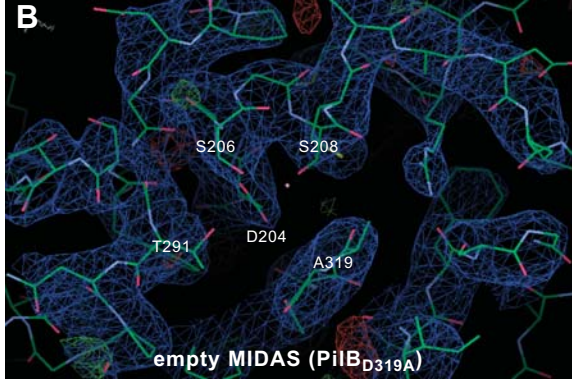

empty MIDAS (PiIB<sub>D319A</sub>)

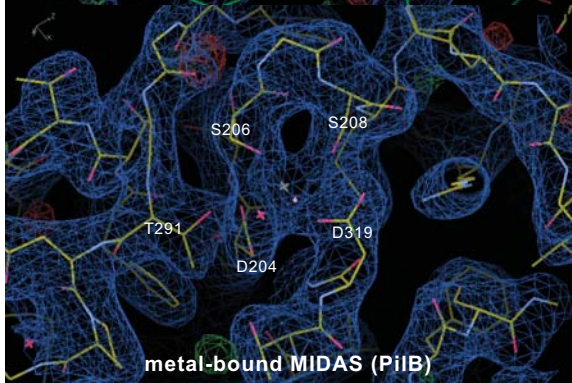

metal-bound MIDAS (PiIB)

**A**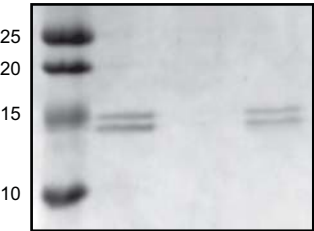

MW

WT

 $\Delta pilD$ *pilB*<sub>D319A</sub>**B**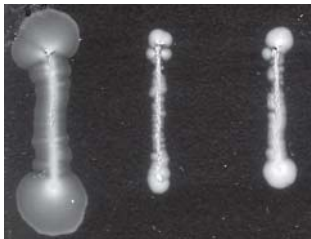

WT

 $\Delta pilD$ *pilB*<sub>D319A</sub>

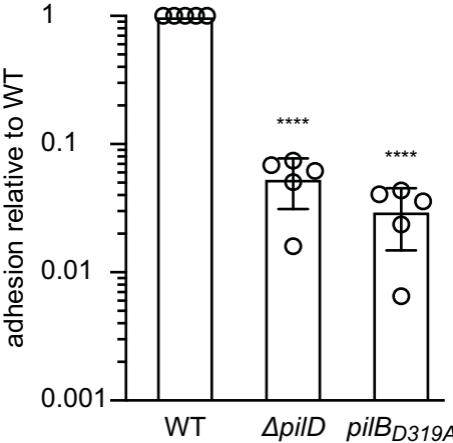



**A**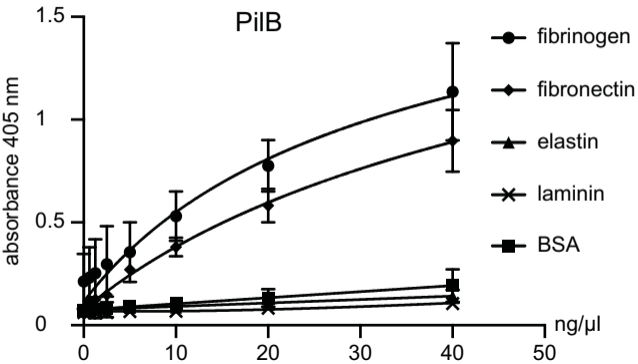**B**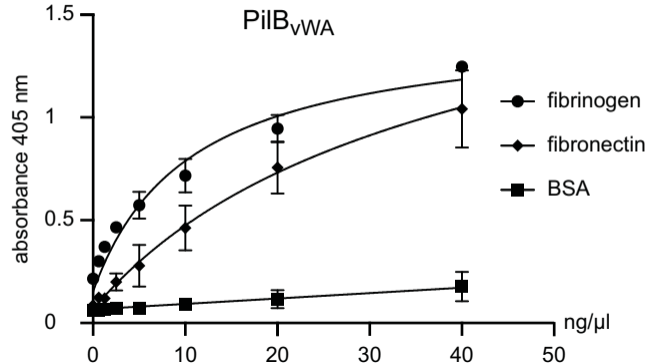

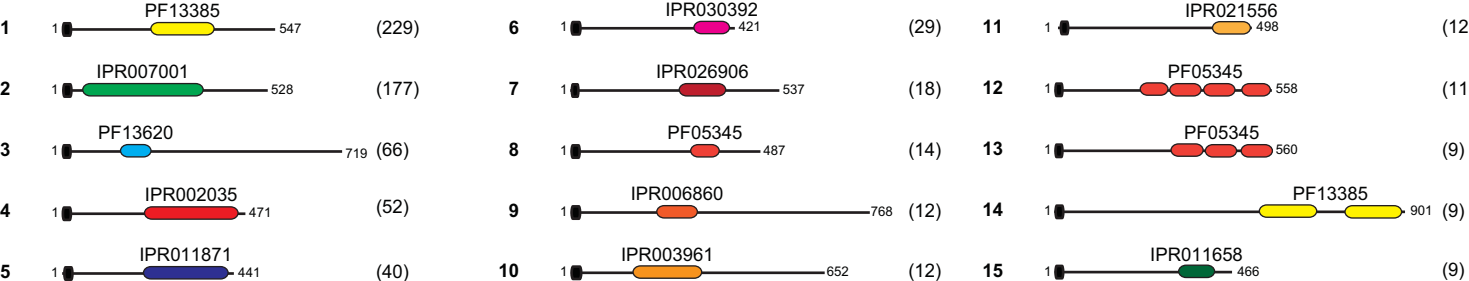

Source: http://biorxiv.org/content/10.1101/2021.01.27.428410v1.full.pdf
